# Supplementary material for: Involvement of Sensory Neurone-TRPV4 in Acute and Chronic Itch Behaviours
Source: PubMed Central journal article supplement — Acta Derm Venereol. 2022 Feb 22;102:1621. doi: 10.2340/actadv.v102.1621 (PMC9121103; doi:10.2340/actadv.v102.1621), 2022-02-22
Supplement: NIHMS1804587-supplement-supplex1.pdf [file NIHMS1804587-supplement-supplex1.pdf]

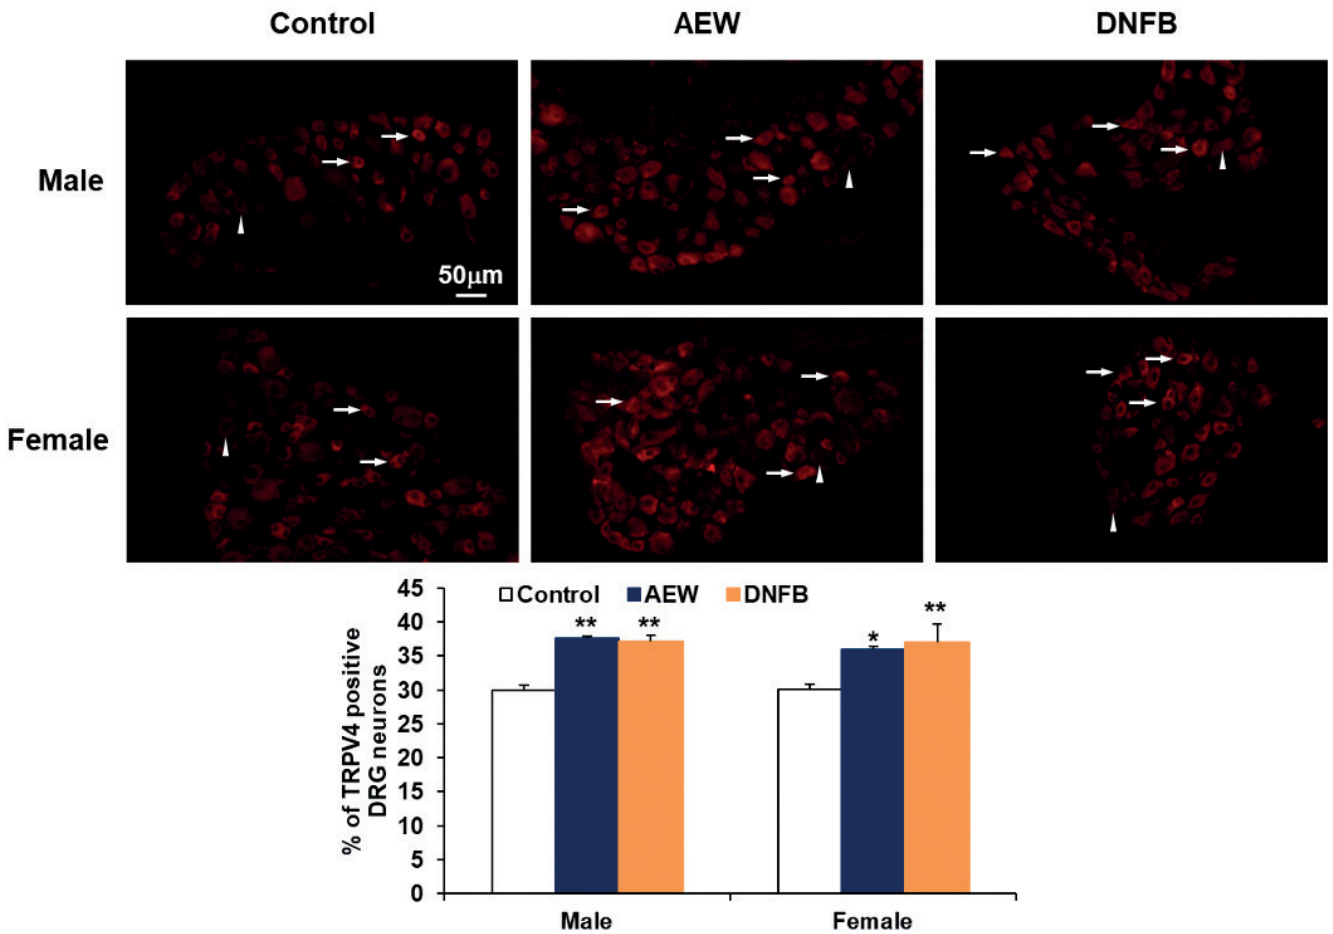

**Fig. S1.** Transient receptor potential cation channel subfamily V member 4 (TRPV4) expression in cervical dorsal root ganglion (DRG) neurones were increased significantly after AEW (day 9) or 1-fluoro-2, 4-dinitrobenzene (DNFB) (day 14) treatment. Arrows and arrowheads represent TRPV4-positive and TRPV4-negative neurones, respectively. \* $p < 0.05$  and \*\* $p < 0.01$  vs control (naïve mice), 1-way analysis of variance (ANOVA) followed by Tukey's *post-hoc* test ( $n = 5$  mice/group).
